# Supplementary figures and images for: Cardiac systolic regional function and synchrony in endurance trained and untrained females
Source: HighWire-hosted journal article supplement (doi:10.1136/bmjsem-2015-000015), 2015-09-01

# Supplementary File 1:

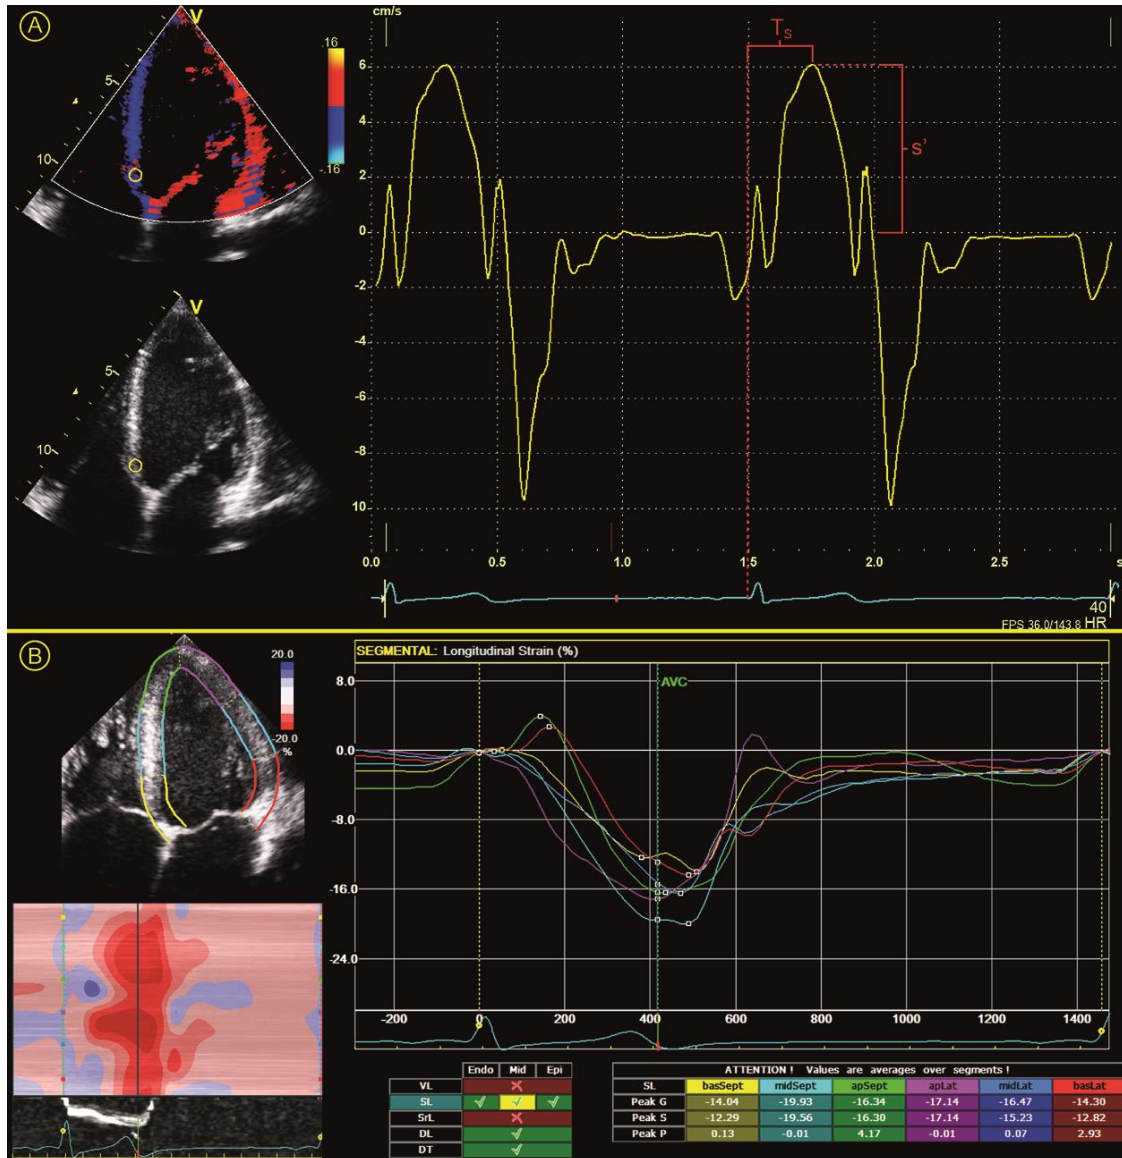

Supplement: bmjsem-2015-000015supp1.pdf [file bmjsem-2015-000015supp1.pdf]
